# Supplementary material for: Understanding Olive Oil Stability Using Filtration and High Hydrostatic Pressure
Source: PubMed Central journal article supplement (PMC7024224; doi:10.3390/molecules25020420), 2020-01-20
Supplement: molecules-25-00420-s001.pdf [file molecules-25-00420-s001.pdf]

TABLE S1. Mean and standard deviation of free fatty acids content (FFA), peroxide value and UV indexes for the four specimens of olive oil samples during storage. Different letters (i.e. a, b for filtration and x, y for storage time) indicate a statistically significant difference with the Tukey HSD post hoc test ( $p < 0.05$ ). CON = veiled and not HHP-treated oil samples; HHP = veiled and HHP-treated oil samples; FIL = filtered and not HHP-treated oil samples; F-HHP = filtered and HHP-treated oil samples.

| Storage time<br>(months)                  | <i>F-HHP</i>           |                        |                        | <i>FIL</i>             |                        |                        | <i>HHP</i>             |                        |                        | <i>CON</i>             |                        |                        |
|-------------------------------------------|------------------------|------------------------|------------------------|------------------------|------------------------|------------------------|------------------------|------------------------|------------------------|------------------------|------------------------|------------------------|
|                                           | 0.5                    | 1                      | 6                      | 0.5                    | 1                      | 6                      | 0.5                    | 1                      | 6                      | 0.5                    | 1                      | 6                      |
| FFA (% oleic acid)                        | 0.19 ±<br>0.03         | 0.21 ±<br>0.01         | 0.19 ±<br>0.04         | 0.20 ±<br>0.03         | 0.19 ±<br>0.04         | 0.19 ±<br>0.04         | 0.21 ±<br>0.04         | 0.16 ±<br>0.02         | 0.23 ±<br>0.06         | 0.21 ±<br>0.02         | 0.21 ±<br>0.03         | 0.27 ±<br>0.02         |
| $K_{232}$                                 | 1.7 ±<br>0.1 b         | 1.8 ±<br>0.1b          | 1.71 ±<br>0.05 b       | 1.75 ±<br>0.04 b       | 1.7 ±<br>0.1 b         | 1.74 ±<br>0.09 b       | 1.58 ±<br>0.03 a       | 1.63 ±<br>0.06 a       | 1.6 ±<br>0.1 a         | 1.57 ±<br>0.06 a       | 1.61 ±<br>0.01 a       | 1.59 ±<br>0.02 a       |
| $K_{270}$                                 | 0.13 ±<br>0.01         | 0.15 ±<br>0.01         | 0.14 ±<br>0.01         | 0.13 ±<br>0.01         | 0.15 ±<br>0.01         | 0.15 ±<br>0.01         | 0.10 ±<br>0.01         | 0.13 ±<br>0.01         | 0.130 ±<br>0.008       | 0.100 ±<br>0.008       | 0.14 ±<br>0.01         | 0.130 ±<br>0.005       |
| $\Delta K$                                | 0.004 ±<br>0.001<br>ax | 0.003 ±<br>0.003<br>ay | 0.003 ±<br>0.000<br>ay | 0.004 ±<br>0.000<br>ax | 0.003 ±<br>0.001<br>ay | 0.003 ±<br>0.001<br>ay | 0.003 ±<br>0.001<br>bx | 0.002 ±<br>0.001<br>by | 0.002 ±<br>0.000<br>by | 0.003 ±<br>0.001<br>bx | 0.002 ±<br>0.000<br>by | 0.001 ±<br>0.000<br>by |
| Peroxide value<br>(meq <sub>O2</sub> /kg) | 4.6 ±<br>0.9 bx        | 5.8 ±<br>0.4 by        | 6.4 ±<br>0.4 by        | 4.3 ±<br>0.4 bx        | 5.3 ±<br>0.8 by        | 5.7 ±<br>0.8 by        | 3.9 ±<br>1.0 ax        | 4.6 ±<br>0.5 ay        | 4.9 ±<br>0.8 ay        | 4.4 ±<br>0.3 ax        | 4.6 ±<br>0.9 ay        | 4.3 ±<br>0.5 ay        |

TABLE S2. Groups of the volatile organic compounds identified and measured in the oil samples.

| <b>C5 compounds</b> | <b>C6 compounds</b> | <b>Microbial metabolite compounds</b> | <b>C7-C8-C9-C10 compounds</b> |
|---------------------|---------------------|---------------------------------------|-------------------------------|
| 3-pentanone         | hexanal             | methanol                              | heptane                       |
| pentanal            | E-2-hexenal         | propanol                              | octane                        |
| 1-penten-3-one      | Z-3-hexenal         | methyl acetate                        | heptanal                      |
| 2-pentanol          | hexyl acetate       | isobutanol                            | octanal                       |
| E-2-pentenal        | E-2-hexenyl acetate | ethyl acetate                         | 2-octanone                    |
| 1-penten-3-ol       | Z-3-hexenyl acetate | 2-butanone                            | 2-heptanol                    |
| 1-pentanol          | 1-hexanol           | methyl propionate                     | E-2-heptenal                  |
| E-2-penten-1-ol     | E-3-hexen-1-ol      | butanal-2-methyl                      | 5-hepten-2-one-6-methyl       |
| Z-2-penten-1-ol     | Z-3-hexen-1-ol      | butanal-3-methyl                      | 2-nonanone                    |
|                     | E-2-hexen-1-ol      | ethanol                               | nonanal                       |
|                     | Z-2-hexen-1-ol      | ethyl propanoate                      | 2,4-hexadienal                |
|                     |                     | R-2-butanol                           | 2,4-heptadienal               |
|                     |                     | butanoic acid ethyl ester             | decanal                       |
|                     |                     | acetic acid butyl ester               | E-2-decenal                   |
|                     |                     | 2-methyl butanol                      | 2,4-nonadienal                |
|                     |                     | 3-methyl butanol                      | 2,4-decadienal                |
|                     |                     | 2-octanol                             |                               |
|                     |                     | E-2-octenal                           |                               |
|                     |                     | 1-octen-3-ol                          |                               |
|                     |                     | acetic acid                           |                               |
|                     |                     | 1-octanol                             |                               |
|                     |                     | butanoic acid                         |                               |
|                     |                     | propanoic acid                        |                               |
|                     |                     | phenol-2-methoxy                      |                               |
|                     |                     | phenylethyl alcohol                   |                               |
|                     |                     | phenol                                |                               |
|                     |                     | phenol-4-ethyl-2-methoxy              |                               |
|                     |                     | 4-ethyl phenol                        |                               |
